# Supplementary material
Source: PubMed Central journal article supplement (PMC4024363)
Supplement: NIHMS571968-supplement-Supplement_1.pdf [file NIHMS571968-supplement-Supplement_1.pdf]

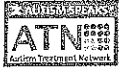

**ATN REGISTRY  
PARENT BASELINE ASSESSMENT**

This form is to help us know about your child's health, and the treatments your child is receiving. The form should be filled in by the person who takes care of the child most of the time.

This questionnaire is designed so you can fill it in yourself. There is no right or wrong answer. Answer each question to the best of your ability.

A staff person will review the form with you after you are done. At that time please ask any questions you had while trying to complete this form. Also, let us know about health problems that were not covered on the form.

Please note that all information is kept strictly confidential.

*For Office Use Only*

ATN ID: \_\_\_\_\_

*Baseline*



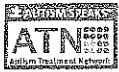

ATN REGISTRY  
PARENT BASELINE ASSESSMENT

A9. Type of Insurance (check all that apply):

- HMO/Managed care
- Private Insurance/Indemnity Plan
- Private Insurance/PPO
- Public Insurance
- Other, please specify: \_\_\_\_\_

A10. Does the child have full or half blood brother(s) or sister (s) enrolled in the ATN Registry?  Yes  No

COMPLETED BY SITE STAFF

A10a. If Yes, what is the ATN ID # of the 1<sup>st</sup> sibling enrolled?

|  |  |  |  |  |  |  |
|--|--|--|--|--|--|--|
|  |  |  |  |  |  |  |
|--|--|--|--|--|--|--|

*For Office Use Only*

ATN ID: \_\_\_\_\_

*Baseline*

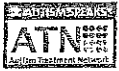

**ATN REGISTRY  
PARENT BASELINE ASSESSMENT**

**SECTION B: HEALTH AND MENTAL HEALTH HISTORY**  
Please check **Yes** for all items that have been a problem for your child **now or in the past.**

|                                                                                                                         | No                       | Yes                      | Unsure                   |
|-------------------------------------------------------------------------------------------------------------------------|--------------------------|--------------------------|--------------------------|
| B1. Headaches                                                                                                           | <input type="checkbox"/> | <input type="checkbox"/> | <input type="checkbox"/> |
| B2. Vision problems                                                                                                     | <input type="checkbox"/> | <input type="checkbox"/> | <input type="checkbox"/> |
| B3. Ear, nose and throat problems                                                                                       | <input type="checkbox"/> | <input type="checkbox"/> | <input type="checkbox"/> |
| B4. Dental problems                                                                                                     | <input type="checkbox"/> | <input type="checkbox"/> | <input type="checkbox"/> |
| B5. Heart conditions                                                                                                    | <input type="checkbox"/> | <input type="checkbox"/> | <input type="checkbox"/> |
| B6. Asthma or other lung problem                                                                                        | <input type="checkbox"/> | <input type="checkbox"/> | <input type="checkbox"/> |
| B7. Nausea/ Vomiting                                                                                                    | <input type="checkbox"/> | <input type="checkbox"/> | <input type="checkbox"/> |
| B8. Reflux                                                                                                              | <input type="checkbox"/> | <input type="checkbox"/> | <input type="checkbox"/> |
| B9. Diarrhea                                                                                                            | <input type="checkbox"/> | <input type="checkbox"/> | <input type="checkbox"/> |
| B10. Constipation                                                                                                       | <input type="checkbox"/> | <input type="checkbox"/> | <input type="checkbox"/> |
| B11. Stomach/abdominal pain                                                                                             | <input type="checkbox"/> | <input type="checkbox"/> | <input type="checkbox"/> |
| B12. Feeding problem                                                                                                    | <input type="checkbox"/> | <input type="checkbox"/> | <input type="checkbox"/> |
| B13. Kidney/ bladder/genital problems                                                                                   | <input type="checkbox"/> | <input type="checkbox"/> | <input type="checkbox"/> |
| B14. Bone or joint problems                                                                                             | <input type="checkbox"/> | <input type="checkbox"/> | <input type="checkbox"/> |
| B15. Blood or anemia problems                                                                                           | <input type="checkbox"/> | <input type="checkbox"/> | <input type="checkbox"/> |
| B16. Skin conditions                                                                                                    | <input type="checkbox"/> | <input type="checkbox"/> | <input type="checkbox"/> |
| B17. Endocrine or hormone problems                                                                                      | <input type="checkbox"/> | <input type="checkbox"/> | <input type="checkbox"/> |
| B18. Seizures                                                                                                           | <input type="checkbox"/> | <input type="checkbox"/> | <input type="checkbox"/> |
| B19. Tics                                                                                                               | <input type="checkbox"/> | <input type="checkbox"/> | <input type="checkbox"/> |
| B20. Allergies (food, medication, environmental):                                                                       | <input type="checkbox"/> | <input type="checkbox"/> | <input type="checkbox"/> |
| B21. Genetic Disorder                                                                                                   | <input type="checkbox"/> | <input type="checkbox"/> | <input type="checkbox"/> |
| B22. Loss of skills/ regression                                                                                         | <input type="checkbox"/> | <input type="checkbox"/> | <input type="checkbox"/> |
| B23. Depression                                                                                                         | <input type="checkbox"/> | <input type="checkbox"/> | <input type="checkbox"/> |
| B24. Bipolar mood disorder                                                                                              | <input type="checkbox"/> | <input type="checkbox"/> | <input type="checkbox"/> |
| B25. Anxiety disorder                                                                                                   | <input type="checkbox"/> | <input type="checkbox"/> | <input type="checkbox"/> |
| B26. Obsessive compulsive disorder (OCD)                                                                                | <input type="checkbox"/> | <input type="checkbox"/> | <input type="checkbox"/> |
| B27. Attention Deficit Hyperactivity Disorder (ADHD)                                                                    | <input type="checkbox"/> | <input type="checkbox"/> | <input type="checkbox"/> |
| B28. If other health condition, specify:<br>_____                                                                       | <input type="checkbox"/> | <input type="checkbox"/> | <input type="checkbox"/> |
| B29. Was your child born with any birth defects<br>and/or genetic conditions not noted above?<br>If Yes, specify: _____ | <input type="checkbox"/> | <input type="checkbox"/> | <input type="checkbox"/> |

ATN ID: \_\_\_\_\_ *For Office Use Only* \_\_\_\_\_ *Baseline*

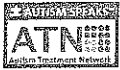

**ATN REGISTRY  
PARENT BASELINE ASSESSMENT**

**SECTION C: CHILD'S SLEEP HABITS QUESTIONNAIRE  
(CSHQ: PRESCHOOL AND SCHOOL-AGED, ABBREVIATED VERSION)  
SURVEY CREATED BY: JUDITH OWENS, MD, MPH**

**Instructions:**

The following statements are about your child's sleep habits and possible difficulties with sleep. Think about the past week in your child's life when answering the questions. If last week was unusual for a specific reason (such as your child had an ear infection and did not sleep well or the TV set was broken), choose the most recent typical week. Answer as follows:

- RARELY if something occurs never or 1 time during a week
- SOMETIMES if it occurs 2-4 times in a week
- USUALLY if something occurs 5 or more times in a week

Also, please indicate whether or not the sleep habit is a problem by checking "NO" or "YES". Please answer each question even if the question asked is not a problem for your child.

**Bedtime Information**

|                                                                    | Time          |                                                            |
|--------------------------------------------------------------------|---------------|------------------------------------------------------------|
| C1. During the week what time does your child usually go to sleep? | _____ : _____ | <input type="checkbox"/> am<br><input type="checkbox"/> pm |
| C2. During the week what time does your child usually wake up?     | _____ : _____ | <input type="checkbox"/> am<br><input type="checkbox"/> pm |
| C3. On the weekend what time does your child usually go to sleep?  | _____ : _____ | <input type="checkbox"/> am<br><input type="checkbox"/> pm |
| C4. On the weekend what time does your child usually wake up?      | _____ : _____ | <input type="checkbox"/> am<br><input type="checkbox"/> pm |

Please answer both questions for each item: a. How often? and b. Is it a problem?

|                                                                       | a. How often?            |                          |                          | b. Is it a problem?      |                          |
|-----------------------------------------------------------------------|--------------------------|--------------------------|--------------------------|--------------------------|--------------------------|
|                                                                       | RARELY<br>(0-1)          | SOME-<br>TIMES<br>(2-4)  | USUALLY<br>(5-7)         | NO                       | YES                      |
| C5. Child goes to bed at the same time at night                       | <input type="checkbox"/> |
| C6. Child falls asleep within 20 minutes after going to bed           | <input type="checkbox"/> |
| C7. Child falls asleep alone in own bed                               | <input type="checkbox"/> |
| C8. Child falls asleep in parent's or sibling's bed                   | <input type="checkbox"/> |
| C9. Child needs parent in the room to fall asleep                     | <input type="checkbox"/> |
| C10. Child struggles at bedtime (cries, refuses to stay in bed, etc.) | <input type="checkbox"/> |
| C11. Child is afraid of sleeping in the dark                          | <input type="checkbox"/> |

*For Office Use Only*

ATN ID: \_\_\_\_\_

*Baseline*

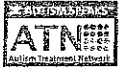

**ATN REGISTRY  
PARENT BASELINE ASSESSMENT**

C12. Child is afraid of sleeping alone    |

**Sleep Behavior**

C13. Child's usual amount of sleep each day (combining night time sleep and naps): \_\_\_\_\_ Hours \_\_\_\_\_ Minutes

|                                                                                         | a. How often?            |                          |                          | b. Is it a problem?      |                          |
|-----------------------------------------------------------------------------------------|--------------------------|--------------------------|--------------------------|--------------------------|--------------------------|
|                                                                                         | RARELY<br>(0-1)          | SOME-TIMES<br>(2-4)      | USUALLY<br>(5-7)         | NO                       | YES                      |
| C14. Child sleeps too little                                                            | <input type="checkbox"/> |
| C15. Child sleeps the right amount                                                      | <input type="checkbox"/> |
| C16. Child sleeps about the same amount each day                                        | <input type="checkbox"/> |
| C17. Child wets the bed at night                                                        | <input type="checkbox"/> |
| C18. Child talks during sleep                                                           | <input type="checkbox"/> |
| C19. Child is restless and moves a lot during sleep                                     | <input type="checkbox"/> |
| C20. Child sleepwalks during the night                                                  | <input type="checkbox"/> |
| C21. Child moves to someone else's bed during the night (parent, brother, sister, etc.) | <input type="checkbox"/> |
| C22. Child grinds teeth during sleep (your dentist may have told you this)              | <input type="checkbox"/> |
| C23. Child snores loudly                                                                | <input type="checkbox"/> |
| C24. Child seems to stop breathing during sleep                                         | <input type="checkbox"/> |
| C25. Child snorts and/or gasps during sleep                                             | <input type="checkbox"/> |
| C26. Child has trouble sleeping away from home (visiting relatives, vacation, etc.)     | <input type="checkbox"/> |
| C27. Child awakens during the night screaming, sweating, and inconsolable               | <input type="checkbox"/> |
| C28. Child awakens alarmed by a frightening dream                                       | <input type="checkbox"/> |

*For Office Use Only*

ATN ID: \_\_\_\_\_

*Baseline*

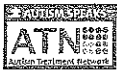

**ATN REGISTRY  
PARENT BASELINE ASSESSMENT**

|                                                                                                                                | a. How often?            |                          |                          | b. Is it a problem?      |                          |
|--------------------------------------------------------------------------------------------------------------------------------|--------------------------|--------------------------|--------------------------|--------------------------|--------------------------|
|                                                                                                                                | RARELY<br>(0-1)          | SOME-TIMES<br>(2-4)      | USUALLY<br>(5-7)         | NO                       | YES                      |
| <b>Waking During the Night</b>                                                                                                 |                          |                          |                          |                          |                          |
| C29. Child awakes once during the night                                                                                        | <input type="checkbox"/> |
| C30. Child awakes more than once during the night                                                                              | <input type="checkbox"/> |
| C31. Write the number of minutes a night waking usually lasts:<br>(If they do not wake during the night, please record 0 min.) |                          |                          |                          | _____ minutes            |                          |

|                                                             | a. How often?            |                          |                          | b. Is it a problem?      |                          |
|-------------------------------------------------------------|--------------------------|--------------------------|--------------------------|--------------------------|--------------------------|
|                                                             | RARELY<br>(0-1)          | SOME-TIMES<br>(2-4)      | USUALLY<br>(5-7)         | NO                       | YES                      |
| <b>Morning Waking/Daytime Sleepiness</b>                    |                          |                          |                          |                          |                          |
| C32. Child wakes up by him/herself                          | <input type="checkbox"/> |
| C33. Child wakes up in negative mood                        | <input type="checkbox"/> |
| C34. Adults or siblings wake up child                       | <input type="checkbox"/> |
| C35. Child has difficulty getting out of bed in the morning | <input type="checkbox"/> |
| C36. Child takes a long time to become alert in the morning | <input type="checkbox"/> |
| C37. Child seems tired                                      | <input type="checkbox"/> |

| Child has appeared very sleepy or fallen asleep during the following: | NOT SLEEPY               | VERY SLEEPY              | FALLS ASLEEP             | NOT APPLICABLE           |
|-----------------------------------------------------------------------|--------------------------|--------------------------|--------------------------|--------------------------|
| C38. ...watching TV                                                   | <input type="checkbox"/> | <input type="checkbox"/> | <input type="checkbox"/> | <input type="checkbox"/> |
| C39. ...riding in car                                                 | <input type="checkbox"/> | <input type="checkbox"/> | <input type="checkbox"/> | <input type="checkbox"/> |

*For Office Use Only*

ATN ID: \_\_\_\_\_

*Baseline*

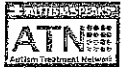

ATN REGISTRY  
PARENT BASELINE ASSESSMENT

**SECTION D: PARENTAL CONCERNS\***

Check what concerns you have about your child now.

|                                                                                                       | <u>No</u>                | <u>Yes</u>               |
|-------------------------------------------------------------------------------------------------------|--------------------------|--------------------------|
| D1. Language use and understanding (doesn't use words, has difficulty initiating conversations, etc.) | <input type="checkbox"/> | <input type="checkbox"/> |
| D2. Sleep problems                                                                                    | <input type="checkbox"/> | <input type="checkbox"/> |
| D3. Gastrointestinal (belly) problems (diarrhea, constipation, pain)                                  | <input type="checkbox"/> | <input type="checkbox"/> |
| D4. Neurologic problems (seizures, tics)                                                              | <input type="checkbox"/> | <input type="checkbox"/> |
| D5. Anxiety (worries a lot)                                                                           | <input type="checkbox"/> | <input type="checkbox"/> |
| D6. Sensory issues (reacts to lights, sounds, textures)                                               | <input type="checkbox"/> | <input type="checkbox"/> |
| D7. Aggression (intentionally hits, bites others, etc.)                                               | <input type="checkbox"/> | <input type="checkbox"/> |
| D8. Hyperactivity (constantly moving, restless, active)                                               | <input type="checkbox"/> | <input type="checkbox"/> |
| D9. Attention span (has difficulty finishing a task, etc.)                                            | <input type="checkbox"/> | <input type="checkbox"/> |
| D10. Mood swings (unpredictable changes between emotions)                                             | <input type="checkbox"/> | <input type="checkbox"/> |
| D11. Eating problems                                                                                  | <input type="checkbox"/> | <input type="checkbox"/> |
| D12. Social interactions (prefers to be alone, has few friends)                                       | <input type="checkbox"/> | <input type="checkbox"/> |
| D13. Repetitive thoughts and behaviors<br>(rocks, spins, flaps hand(s), etc.)                         | <input type="checkbox"/> | <input type="checkbox"/> |
| D14. Self-injurious behavior<br>(bangs head, pinches, bites, hits oneself, etc.)                      | <input type="checkbox"/> | <input type="checkbox"/> |
| D15. Has lost or seems to be losing skills that he/she previously had (motor, academic, language)     | <input type="checkbox"/> | <input type="checkbox"/> |

\*Used with permission from Susan McGrew, MD

*For Office Use Only*

ATN ID: \_\_\_\_\_

*Baseline*





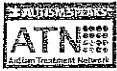

ATN REGISTRY  
PARENT BASELINE ASSESSMENT

**SECTION F: COMPLEMENTARY/ALTERNATIVE MEDICINE (CAM) INTERVENTIONS**

F1. Is your child receiving any complementary or alternative treatments?  No  Yes  
F1a. If Yes, check all that apply:

- |                                                               |                                                        |
|---------------------------------------------------------------|--------------------------------------------------------|
| <input type="checkbox"/> Chiropractics                        | <input type="checkbox"/> Amino Acids                   |
| <input type="checkbox"/> High dosing Vitamin B6 and magnesium | <input type="checkbox"/> Essential fatty acids         |
| <input type="checkbox"/> Other vitamin supplements            | <input type="checkbox"/> Gluten-free diet              |
| <input type="checkbox"/> Probiotics                           | <input type="checkbox"/> Casein-free diet              |
| <input type="checkbox"/> Digestive enzymes                    | <input type="checkbox"/> No processed sugars           |
| <input type="checkbox"/> Glutathione                          | <input type="checkbox"/> Other, <i>specify</i> : _____ |

Additional comments: \_\_\_\_\_  
\_\_\_\_\_  
\_\_\_\_\_

END OF FORM

ATN ID: \_\_\_\_\_ *For Office Use Only* \_\_\_\_\_ *Baseline*
