# Supplementary material
Source: PubMed Central journal article supplement (PMC4024363)
Supplement: NIHMS571968-supplement-Supplement_2.pdf [file NIHMS571968-supplement-Supplement_2.pdf]

**Parent/Guardian Instructions:**

*This covers a wide range of information regarding the medical history of you and your child. The questionnaire should only be completed by the child's primary caregiver (that is, the person who is responsible for taking care of the child most of the time). If you are not a primary caregiver, please let a staff member know and do not complete this questionnaire.*

*This questionnaire is designed so you can fill it in yourself. There are no right or wrong answers, but please answer each question to the best of your ability. You may want or need to check records that you have at home related to the birth and early examination of your child. You may choose not to answer questions that make you uncomfortable.*

*Once you have completed this form it will be reviewed with you by a staff person. At that time please ask any questions you had while trying to complete this form. Please feel free to raise any development or medical problems your child may have had that you feel are not covered adequately by the form.*

*Please note that all information is kept strictly confidential.*

For Office Use Only

ATN ID: \_\_\_\_\_

Baseline Visit Only

**Section A: KEY IDENTIFYING INFORMATION AND FAMILY BACKGROUND**

A1. Date form completed .....        
mm dd yyyy

A2. Please indicate your relationship to the child:

- Biological mother
- Biological father
- Other

A2a. If "Other", specify: \_\_\_\_\_

**Section B: PREGNANCY HISTORY**

B1. Is the pregnancy history of the biological mother available?  No  Yes  
If "No", skip to C1

B1a. Please indicate the number of pregnancies of the biological mother: \_\_\_\_\_

B1b. And the number of live births: \_\_\_\_\_

**Section C: PREGNANCY & PERINATAL HISTORY**  
*Instructions: Answer section C-G questions with respect to the pregnancy with the child.*

C1. Did the mother receive assisted reproductive technology?  No  Yes  Unsure

C2. Mother's age at birth of child : \_\_\_\_\_ Years  Don't Know

C3. Father's age at birth of child : \_\_\_\_\_ Years  Don't Know

**Section D: ILLNESS/EVENTS DURING PREGNANCY**

Please indicate whether the mother had any of the following illnesses/events during the pregnancy **with the child**:

D1. Fever over 101°F:  No  Yes  Unsure  
(excluding those occurring during labor & delivery)

D2. Any infection:  No  Yes  Unsure

D3. Any other complication:  No  Yes  Unsure

*For Office Use Only*

ATN ID: \_\_\_\_\_

**Section E: MEDICATIONS DURING PREGNANCY**

E1. During this pregnancy, did the mother take any prescription medications?  No  Yes  
 If "Yes", complete the information below:

| <b>Prescription Medication</b>                                                                                                                                                                                                                                                                                                                                                       | <b>No</b>                | <b>Yes</b>               | <b>Unsure</b>            |
|--------------------------------------------------------------------------------------------------------------------------------------------------------------------------------------------------------------------------------------------------------------------------------------------------------------------------------------------------------------------------------------|--------------------------|--------------------------|--------------------------|
| E1a. Depakote:<br>(Depakene, Valproic Acid)                                                                                                                                                                                                                                                                                                                                          | <input type="checkbox"/> | <input type="checkbox"/> | <input type="checkbox"/> |
| E1b. Lithium:                                                                                                                                                                                                                                                                                                                                                                        | <input type="checkbox"/> | <input type="checkbox"/> | <input type="checkbox"/> |
| E1c. Anti-epileptics or anti-seizures:<br>(not including Depakote)<br>e.g., Carbamazepine (Tegretol, Carbatrol),<br>Gabapentin (Neurontin), Lamotrigine (Lamictal),<br>Levetiracetam (Keppra), Oxcarbazepine (Trileptal),<br>Phenobarbital, Phenytoin (Dilantin), Topiramate<br>(Topamax)                                                                                            | <input type="checkbox"/> | <input type="checkbox"/> | <input type="checkbox"/> |
| E1d. Antidepressants:<br>e.g., Amitriptyline (Elavil), Bupropion (Wellbutrin),<br>Citalopram (Celexa), Escitalopram (Lexapro),<br>Fluoxetine (Prozac), Fluvoxamine (Luvox),<br>Imipramine (Tofranil), Paroxetine (Paxil), Sertraline<br>(Zoloft), Venlafaxine (Effexor)                                                                                                              | <input type="checkbox"/> | <input type="checkbox"/> | <input type="checkbox"/> |
| E1e. Mood stabilizers or antipsychotics:<br>(not including Lithium)<br>e.g., Carbamazepine (Carbatrol, Tegretol),<br>Chlorpromazine (Thorazine), Gabapentin<br>(Neurontin), Haloperidol (Haldol), Lamotrigine<br>(Lamictal), Olanzapine (Zyprexa), Oxcarbazepine<br>(Trileptal), Quetiapine (Seroquel), Risperidone<br>(Risperdal), Thioridazine (Mellaril), Topiramate<br>(Topamax) | <input type="checkbox"/> | <input type="checkbox"/> | <input type="checkbox"/> |
| E1f. Asthma medication:<br>e.g., Fluticasone (Flovent), Budesonide (Pulmicort),<br>Triamcinolone (Azmacort), Flunisolide (Aeobid),<br>Beclomethasone (Qvar), Ipratropium (Atrovent),<br>Salmeterol (Serevent Diskus), Cromolyn (Latal),<br>Formoterol (Foradil Aerolizer), Nedocromil (Tilade),<br>Montelukast (Singulair), Zafirlukast (Accolate)                                   | <input type="checkbox"/> | <input type="checkbox"/> | <input type="checkbox"/> |
| E1g. Other:<br>If "Other", specify:                                                                                                                                                                                                                                                                                                                                                  | <input type="checkbox"/> | <input type="checkbox"/> | <input type="checkbox"/> |

*For Office Use Only*

ATN ID: \_\_\_\_\_

**Section F: PRE-NATAL SUBSTANCE USE**

*Note: Please be aware that all information shared is kept strictly confidential*

During the pregnancy with the child, please identify whether the mother participated in any of the following activities:

- F1. Alcohol Use: No Yes Unsure
- F2. Use of cigarettes or other tobacco products: No Yes Unsure
- F3. Other substance use, specify: \_\_\_\_\_ No Yes Unsure

**Section G: LABOR & DELIVERY**

- G1. Was your child a product of a multiple birth pregnancy? No Yes  
If "No", skip to G2.  
If "Yes", was the multiple birth: Twins Other Multiple  
If "Twins", what type: Identical Fraternal Unsure
- G2. Was Pitocin used to induce or augment this labor? No Yes Unsure
- G3. Any labor or delivery complications? No Yes Unsure  
If "Yes", describe: \_\_\_\_\_  
\_\_\_\_\_  
\_\_\_\_\_
- G4. How much did your child weigh at birth? \_\_\_\_\_ lbs \_\_\_\_\_ oz OR \_\_\_\_\_ . \_\_\_\_\_ kg  
*Enter in pounds and ounces OR kilograms*
- G5. Was your child admitted to the NICU (neonatal intensive care unit)? No Yes Unsure  
If "Yes":  
G5a. For what reason? \_\_\_\_\_  
G5b. How old was your child when discharged from the NICU: \_\_\_\_\_ days

*For Office Use Only*

ATN ID: \_\_\_\_\_

**Section H: NEWBORN PROBLEMS AND DEVELOPMENT**

*Instructions: Answer section H-M questions with respect to the child.*

- H1. Was your child initially breast or bottle fed?      Bottle    Breast    Both
- H2. If breastfed did your child have any feeding difficulty during his/her first month of life (e.g., difficulty latching on)?      No      Yes      Unsure

**Section I: DEVELOPMENT HISTORY**

Please specify if your child has accomplished any of the following (If "Yes", please provide your best estimate of the age achieved. If unsure of age, write "unsure"):

- |                                              | a. Achieved?             |                          | b. If "Yes" age achieved: |
|----------------------------------------------|--------------------------|--------------------------|---------------------------|
|                                              | No                       | Yes                      |                           |
| 11. Sit (without support when placed):       | <input type="checkbox"/> | <input type="checkbox"/> | _____ months              |
| 12. Walk (without holding on):               | <input type="checkbox"/> | <input type="checkbox"/> | _____ months              |
| 13. First words (other than mama/dada):      | <input type="checkbox"/> | <input type="checkbox"/> | _____ months              |
| 14. First phrases (2-3 words):               | <input type="checkbox"/> | <input type="checkbox"/> | _____ months              |
| 15. Toilet training: <u>day, bladder</u> :   | <input type="checkbox"/> | <input type="checkbox"/> | _____ months              |
| 16. Toilet training: <u>day, bowel</u> :     | <input type="checkbox"/> | <input type="checkbox"/> | _____ months              |
| 17. Toilet training: <u>night, bladder</u> : | <input type="checkbox"/> | <input type="checkbox"/> | _____ months              |

*For Office Use Only*

ATN ID: \_\_\_\_\_

**Section J: PAST MEDICAL HISTORY/HEALTH CONDITION**

**Directions:** For each condition or symptom listed below, please **check** the extent to which it has been a health problem for your child.

|            |                                    | <b>No Problem</b>        | <b>Mild Problem<br/>(infrequent /<br/>resolved)</b> | <b>Moderate Problem<br/>(recurrent /<br/>affects life)</b> | <b>Severe Problem<br/>(frequent /<br/>impacts quality<br/>of life)</b> |
|------------|------------------------------------|--------------------------|-----------------------------------------------------|------------------------------------------------------------|------------------------------------------------------------------------|
| <b>J1.</b> | <b>Head or skull abnormalities</b> |                          |                                                     |                                                            |                                                                        |
|            | J1a. Large head                    | <input type="checkbox"/> | <input type="checkbox"/>                            | <input type="checkbox"/>                                   | <input type="checkbox"/>                                               |
|            | J1b. Misshapen                     | <input type="checkbox"/> | <input type="checkbox"/>                            | <input type="checkbox"/>                                   | <input type="checkbox"/>                                               |
|            | J1c. Open soft spot                | <input type="checkbox"/> | <input type="checkbox"/>                            | <input type="checkbox"/>                                   | <input type="checkbox"/>                                               |
|            | J1d. Other, specify:               | <input type="checkbox"/> | <input type="checkbox"/>                            | <input type="checkbox"/>                                   | <input type="checkbox"/>                                               |
| <b>J2.</b> | <b>Headaches</b>                   | <input type="checkbox"/> | <input type="checkbox"/>                            | <input type="checkbox"/>                                   | <input type="checkbox"/>                                               |
| <b>J3.</b> | <b>Eye conditions</b>              |                          |                                                     |                                                            |                                                                        |
|            | J3a. Near sighted                  | <input type="checkbox"/> | <input type="checkbox"/>                            | <input type="checkbox"/>                                   | <input type="checkbox"/>                                               |
|            | J3b. Far sighted                   | <input type="checkbox"/> | <input type="checkbox"/>                            | <input type="checkbox"/>                                   | <input type="checkbox"/>                                               |
|            | J3c. Lazy eye                      | <input type="checkbox"/> | <input type="checkbox"/>                            | <input type="checkbox"/>                                   | <input type="checkbox"/>                                               |
|            | J3d. Other, specify:               | <input type="checkbox"/> | <input type="checkbox"/>                            | <input type="checkbox"/>                                   | <input type="checkbox"/>                                               |
| <b>J4.</b> | <b>Ear conditions</b>              |                          |                                                     |                                                            |                                                                        |
|            | J4a. Infections                    | <input type="checkbox"/> | <input type="checkbox"/>                            | <input type="checkbox"/>                                   | <input type="checkbox"/>                                               |
|            | J4b. Hearing                       | <input type="checkbox"/> | <input type="checkbox"/>                            | <input type="checkbox"/>                                   | <input type="checkbox"/>                                               |
|            | J4c. Other, specify:               | <input type="checkbox"/> | <input type="checkbox"/>                            | <input type="checkbox"/>                                   | <input type="checkbox"/>                                               |
| <b>J5.</b> | <b>Nose problems</b>               |                          |                                                     |                                                            |                                                                        |
|            | J5a. Sinus infections              | <input type="checkbox"/> | <input type="checkbox"/>                            | <input type="checkbox"/>                                   | <input type="checkbox"/>                                               |
|            | J5b. Blockage                      | <input type="checkbox"/> | <input type="checkbox"/>                            | <input type="checkbox"/>                                   | <input type="checkbox"/>                                               |
|            | J5c. Other, specify:               | <input type="checkbox"/> | <input type="checkbox"/>                            | <input type="checkbox"/>                                   | <input type="checkbox"/>                                               |
| <b>J6.</b> | <b>Lip or Throat problems</b>      |                          |                                                     |                                                            |                                                                        |
|            | J6a. Infections                    | <input type="checkbox"/> | <input type="checkbox"/>                            | <input type="checkbox"/>                                   | <input type="checkbox"/>                                               |
|            | J6b. Large tonsils                 | <input type="checkbox"/> | <input type="checkbox"/>                            | <input type="checkbox"/>                                   | <input type="checkbox"/>                                               |
|            | J6c. Cleft lip or palette          | <input type="checkbox"/> | <input type="checkbox"/>                            | <input type="checkbox"/>                                   | <input type="checkbox"/>                                               |
|            | J6d. Other, specify:               | <input type="checkbox"/> | <input type="checkbox"/>                            | <input type="checkbox"/>                                   | <input type="checkbox"/>                                               |
| <b>J7.</b> | <b>Dental problems</b>             |                          |                                                     |                                                            |                                                                        |
|            | J7a. Cavities                      | <input type="checkbox"/> | <input type="checkbox"/>                            | <input type="checkbox"/>                                   | <input type="checkbox"/>                                               |
|            | J7b. Enamel                        | <input type="checkbox"/> | <input type="checkbox"/>                            | <input type="checkbox"/>                                   | <input type="checkbox"/>                                               |
|            | J7c. Routine checkups              | <input type="checkbox"/> | <input type="checkbox"/>                            | <input type="checkbox"/>                                   | <input type="checkbox"/>                                               |
|            | J7d. Other, specify:               | <input type="checkbox"/> | <input type="checkbox"/>                            | <input type="checkbox"/>                                   | <input type="checkbox"/>                                               |

*For Office Use Only*

ATN ID: \_\_\_\_\_

|       |                                         | No Problem               | Mild Problem<br>(infrequent /<br>resolved) | Moderate Problem<br>(recurrent /<br>affects life) | Severe Problem<br>(frequent /<br>impacts quality<br>of life) |
|-------|-----------------------------------------|--------------------------|--------------------------------------------|---------------------------------------------------|--------------------------------------------------------------|
| J8.   | Heart conditions                        |                          |                                            |                                                   |                                                              |
| J8a.  | Murmur                                  | <input type="checkbox"/> | <input type="checkbox"/>                   | <input type="checkbox"/>                          | <input type="checkbox"/>                                     |
| J8b.  | Hole in heart or structural<br>problem  | <input type="checkbox"/> | <input type="checkbox"/>                   | <input type="checkbox"/>                          | <input type="checkbox"/>                                     |
| J8c.  | Rapid rate                              | <input type="checkbox"/> | <input type="checkbox"/>                   | <input type="checkbox"/>                          | <input type="checkbox"/>                                     |
| J8d.  | Other, specify:                         | <input type="checkbox"/> | <input type="checkbox"/>                   | <input type="checkbox"/>                          | <input type="checkbox"/>                                     |
| J9.   | Lung conditions                         |                          |                                            |                                                   |                                                              |
| J9a.  | Asthma                                  | <input type="checkbox"/> | <input type="checkbox"/>                   | <input type="checkbox"/>                          | <input type="checkbox"/>                                     |
| J9b.  | Pneumonia                               | <input type="checkbox"/> | <input type="checkbox"/>                   | <input type="checkbox"/>                          | <input type="checkbox"/>                                     |
| J9c.  | Bronchitis                              | <input type="checkbox"/> | <input type="checkbox"/>                   | <input type="checkbox"/>                          | <input type="checkbox"/>                                     |
| J9d.  | Other, specify:                         | <input type="checkbox"/> | <input type="checkbox"/>                   | <input type="checkbox"/>                          | <input type="checkbox"/>                                     |
| J10.  | Breast enlargement or milk<br>discharge | <input type="checkbox"/> | <input type="checkbox"/>                   | <input type="checkbox"/>                          | <input type="checkbox"/>                                     |
| J11.  | Stomach problems                        |                          |                                            |                                                   |                                                              |
| J11a. | Vomiting                                | <input type="checkbox"/> | <input type="checkbox"/>                   | <input type="checkbox"/>                          | <input type="checkbox"/>                                     |
| J11b. | Reflux                                  | <input type="checkbox"/> | <input type="checkbox"/>                   | <input type="checkbox"/>                          | <input type="checkbox"/>                                     |
| J11c. | Diarrhea                                | <input type="checkbox"/> | <input type="checkbox"/>                   | <input type="checkbox"/>                          | <input type="checkbox"/>                                     |
| J11d. | Constipation                            | <input type="checkbox"/> | <input type="checkbox"/>                   | <input type="checkbox"/>                          | <input type="checkbox"/>                                     |
| J11e. | Pain                                    | <input type="checkbox"/> | <input type="checkbox"/>                   | <input type="checkbox"/>                          | <input type="checkbox"/>                                     |
| J11f. | Other, specify:                         | <input type="checkbox"/> | <input type="checkbox"/>                   | <input type="checkbox"/>                          | <input type="checkbox"/>                                     |
| J12.  | Kidney, bladder or urine problems       |                          |                                            |                                                   |                                                              |
| J12a. | Infections                              | <input type="checkbox"/> | <input type="checkbox"/>                   | <input type="checkbox"/>                          | <input type="checkbox"/>                                     |
| J12b. | Stones                                  | <input type="checkbox"/> | <input type="checkbox"/>                   | <input type="checkbox"/>                          | <input type="checkbox"/>                                     |
| J12c. | Urine reflux                            | <input type="checkbox"/> | <input type="checkbox"/>                   | <input type="checkbox"/>                          | <input type="checkbox"/>                                     |
| J12d. | Day or nighttime wetting                | <input type="checkbox"/> | <input type="checkbox"/>                   | <input type="checkbox"/>                          | <input type="checkbox"/>                                     |
| J12e. | Other, specify:                         | <input type="checkbox"/> | <input type="checkbox"/>                   | <input type="checkbox"/>                          | <input type="checkbox"/>                                     |
| J13.  | Genital problems                        |                          |                                            |                                                   |                                                              |
| J13a. | Hernia                                  | <input type="checkbox"/> | <input type="checkbox"/>                   | <input type="checkbox"/>                          | <input type="checkbox"/>                                     |
| J13b. | Undescended testicle                    | <input type="checkbox"/> | <input type="checkbox"/>                   | <input type="checkbox"/>                          | <input type="checkbox"/>                                     |
| J13c. | Other, specify:                         | <input type="checkbox"/> | <input type="checkbox"/>                   | <input type="checkbox"/>                          | <input type="checkbox"/>                                     |
| J14.  | Bone or joint problems                  |                          |                                            |                                                   |                                                              |
| J14a. | Spine curvature                         | <input type="checkbox"/> | <input type="checkbox"/>                   | <input type="checkbox"/>                          | <input type="checkbox"/>                                     |
| J14b. | Arthritis                               | <input type="checkbox"/> | <input type="checkbox"/>                   | <input type="checkbox"/>                          | <input type="checkbox"/>                                     |
| J14c. | Osteoporosis                            | <input type="checkbox"/> | <input type="checkbox"/>                   | <input type="checkbox"/>                          | <input type="checkbox"/>                                     |
| J14d. | Club foot                               | <input type="checkbox"/> | <input type="checkbox"/>                   | <input type="checkbox"/>                          | <input type="checkbox"/>                                     |
| J14e. | Other, specify:                         | <input type="checkbox"/> | <input type="checkbox"/>                   | <input type="checkbox"/>                          | <input type="checkbox"/>                                     |

*For Office Use Only*

ATN ID: \_\_\_\_\_

|                                           | No Problem               | Mild Problem<br>(infrequent /<br>resolved) | Moderate Problem<br>(recurrent /<br>affects life) | Severe Problem<br>(frequent /<br>impacts quality<br>of life) |
|-------------------------------------------|--------------------------|--------------------------------------------|---------------------------------------------------|--------------------------------------------------------------|
| <b>J15. Skin conditions</b>               |                          |                                            |                                                   |                                                              |
| J15a. Eczema                              | <input type="checkbox"/> | <input type="checkbox"/>                   | <input type="checkbox"/>                          | <input type="checkbox"/>                                     |
| J15b. Psoriasis                           | <input type="checkbox"/> | <input type="checkbox"/>                   | <input type="checkbox"/>                          | <input type="checkbox"/>                                     |
| J15c. Moles                               | <input type="checkbox"/> | <input type="checkbox"/>                   | <input type="checkbox"/>                          | <input type="checkbox"/>                                     |
| J15d. Café au lait                        | <input type="checkbox"/> | <input type="checkbox"/>                   | <input type="checkbox"/>                          | <input type="checkbox"/>                                     |
| J15e. Rash                                | <input type="checkbox"/> | <input type="checkbox"/>                   | <input type="checkbox"/>                          | <input type="checkbox"/>                                     |
| J15f. Acne                                | <input type="checkbox"/> | <input type="checkbox"/>                   | <input type="checkbox"/>                          | <input type="checkbox"/>                                     |
| J15g. Other, specify:                     | <input type="checkbox"/> | <input type="checkbox"/>                   | <input type="checkbox"/>                          | <input type="checkbox"/>                                     |
| <b>J16. Endocrine or hormone problems</b> |                          |                                            |                                                   |                                                              |
| J16a. Diabetes                            | <input type="checkbox"/> | <input type="checkbox"/>                   | <input type="checkbox"/>                          | <input type="checkbox"/>                                     |
| J16b. Thyroid                             | <input type="checkbox"/> | <input type="checkbox"/>                   | <input type="checkbox"/>                          | <input type="checkbox"/>                                     |
| J16c. Early or late puberty               | <input type="checkbox"/> | <input type="checkbox"/>                   | <input type="checkbox"/>                          | <input type="checkbox"/>                                     |
| J16d. Menstrual problems                  | <input type="checkbox"/> | <input type="checkbox"/>                   | <input type="checkbox"/>                          | <input type="checkbox"/>                                     |
| J16e. Other, specify:                     | <input type="checkbox"/> | <input type="checkbox"/>                   | <input type="checkbox"/>                          | <input type="checkbox"/>                                     |
| <b>J17. Growth problem</b>                |                          |                                            |                                                   |                                                              |
| J17a. Short stature                       | <input type="checkbox"/> | <input type="checkbox"/>                   | <input type="checkbox"/>                          | <input type="checkbox"/>                                     |
| J17b. Growth hormone                      | <input type="checkbox"/> | <input type="checkbox"/>                   | <input type="checkbox"/>                          | <input type="checkbox"/>                                     |
| J17c. Over or under weight                | <input type="checkbox"/> | <input type="checkbox"/>                   | <input type="checkbox"/>                          | <input type="checkbox"/>                                     |
| J17d. Other, specify:                     | <input type="checkbox"/> | <input type="checkbox"/>                   | <input type="checkbox"/>                          | <input type="checkbox"/>                                     |
| <b>J18. Tics or movement disorders</b>    |                          |                                            |                                                   |                                                              |
| J18a. Tourettes                           | <input type="checkbox"/> | <input type="checkbox"/>                   | <input type="checkbox"/>                          | <input type="checkbox"/>                                     |
| J18b. Eye blinking                        | <input type="checkbox"/> | <input type="checkbox"/>                   | <input type="checkbox"/>                          | <input type="checkbox"/>                                     |
| J18c. Shrugging                           | <input type="checkbox"/> | <input type="checkbox"/>                   | <input type="checkbox"/>                          | <input type="checkbox"/>                                     |
| J18d. Head movements                      | <input type="checkbox"/> | <input type="checkbox"/>                   | <input type="checkbox"/>                          | <input type="checkbox"/>                                     |
| J18e. Tongue movements                    | <input type="checkbox"/> | <input type="checkbox"/>                   | <input type="checkbox"/>                          | <input type="checkbox"/>                                     |
| J18f. Hand wringing                       | <input type="checkbox"/> | <input type="checkbox"/>                   | <input type="checkbox"/>                          | <input type="checkbox"/>                                     |
| J18g. Coordination or gait<br>problems    | <input type="checkbox"/> | <input type="checkbox"/>                   | <input type="checkbox"/>                          | <input type="checkbox"/>                                     |
| J18h. Other, specify:                     | <input type="checkbox"/> | <input type="checkbox"/>                   | <input type="checkbox"/>                          | <input type="checkbox"/>                                     |
| <b>J19. Allergies:</b>                    |                          |                                            |                                                   |                                                              |
| J19a. Foods, specify:                     | <input type="checkbox"/> | <input type="checkbox"/>                   | <input type="checkbox"/>                          | <input type="checkbox"/>                                     |
| J19b. Medications, specify:               | <input type="checkbox"/> | <input type="checkbox"/>                   | <input type="checkbox"/>                          | <input type="checkbox"/>                                     |
| J19c. Environmental, specify:             | <input type="checkbox"/> | <input type="checkbox"/>                   | <input type="checkbox"/>                          | <input type="checkbox"/>                                     |

*For Office Use Only*

ATN ID: \_\_\_\_\_

|                                                                           | No Problem                         | Mild Problem<br>(infrequent /<br>resolved) | Moderate Problem<br>(recurrent /<br>affects life) | Severe Problem<br>(frequent /<br>impacts quality<br>of life) |
|---------------------------------------------------------------------------|------------------------------------|--------------------------------------------|---------------------------------------------------|--------------------------------------------------------------|
| J20. Loss of previously acquired skill                                    |                                    |                                            |                                                   |                                                              |
| J20a. Language, specify: _____                                            | <input type="checkbox"/>           | <input type="checkbox"/>                   | <input type="checkbox"/>                          | <input type="checkbox"/>                                     |
| J20b. Motor, specify: _____                                               | <input type="checkbox"/>           | <input type="checkbox"/>                   | <input type="checkbox"/>                          | <input type="checkbox"/>                                     |
| J20c. Academic, specify: _____                                            | <input type="checkbox"/>           | <input type="checkbox"/>                   | <input type="checkbox"/>                          | <input type="checkbox"/>                                     |
| J21. Seizures                                                             |                                    |                                            |                                                   |                                                              |
| J21a. Staring spells                                                      | <input type="checkbox"/>           | <input type="checkbox"/>                   | <input type="checkbox"/>                          | <input type="checkbox"/>                                     |
| J21b. Rhythmic jerking                                                    | <input type="checkbox"/>           | <input type="checkbox"/>                   | <input type="checkbox"/>                          | <input type="checkbox"/>                                     |
| J21c. Febrile seizures                                                    | <input type="checkbox"/>           | <input type="checkbox"/>                   | <input type="checkbox"/>                          | <input type="checkbox"/>                                     |
| J21d. Other diagnosed seizures                                            | <input type="checkbox"/>           | <input type="checkbox"/>                   | <input type="checkbox"/>                          | <input type="checkbox"/>                                     |
| J21e. Other, specify: _____                                               | <input type="checkbox"/>           | <input type="checkbox"/>                   | <input type="checkbox"/>                          | <input type="checkbox"/>                                     |
| J22. Previously diagnosed psychiatric illness                             |                                    |                                            |                                                   |                                                              |
| J22a. Anxiety                                                             | <input type="checkbox"/>           | <input type="checkbox"/>                   | <input type="checkbox"/>                          | <input type="checkbox"/>                                     |
| J22b. Depression                                                          | <input type="checkbox"/>           | <input type="checkbox"/>                   | <input type="checkbox"/>                          | <input type="checkbox"/>                                     |
| J22c. Manic                                                               | <input type="checkbox"/>           | <input type="checkbox"/>                   | <input type="checkbox"/>                          | <input type="checkbox"/>                                     |
| J22d. Obsessive / compulsive                                              | <input type="checkbox"/>           | <input type="checkbox"/>                   | <input type="checkbox"/>                          | <input type="checkbox"/>                                     |
| J22e. ADHD                                                                | <input type="checkbox"/>           | <input type="checkbox"/>                   | <input type="checkbox"/>                          | <input type="checkbox"/>                                     |
| J22f. Schizophrenia                                                       | <input type="checkbox"/>           | <input type="checkbox"/>                   | <input type="checkbox"/>                          | <input type="checkbox"/>                                     |
| J22g. Other, specify: _____                                               | <input type="checkbox"/>           | <input type="checkbox"/>                   | <input type="checkbox"/>                          | <input type="checkbox"/>                                     |
| J23. Eating or craving non food items<br>Specify item(s): _____           | <input type="checkbox"/>           | <input type="checkbox"/>                   | <input type="checkbox"/>                          | <input type="checkbox"/>                                     |
| J24. Was your child born with any birth<br>defects not noted above?       | No<br><input type="checkbox"/>     | Yes<br><input type="checkbox"/>            | Unsure<br><input type="checkbox"/>                |                                                              |
| J24a. If "Yes", specify: _____                                            |                                    |                                            |                                                   |                                                              |
| J25. Has your child ever had a hearing<br>test by an audiologist?         | No<br><input type="checkbox"/>     | Yes<br><input type="checkbox"/>            | Unsure<br><input type="checkbox"/>                |                                                              |
| J25a. If "Yes", what were the<br>results of the most recent test?         | Normal<br><input type="checkbox"/> | Abnormal<br><input type="checkbox"/>       | Unsure<br><input type="checkbox"/>                |                                                              |
| J26. Has your child ever had a brain<br>stem test (ABR) done for hearing? | No<br><input type="checkbox"/>     | Yes<br><input type="checkbox"/>            | Unsure<br><input type="checkbox"/>                |                                                              |
| J26a. If "Yes", what were the<br>results of the most recent test?         | Normal<br><input type="checkbox"/> | Abnormal<br><input type="checkbox"/>       | Unsure<br><input type="checkbox"/>                |                                                              |

*For Office Use Only*

ATN ID: \_\_\_\_\_

Please indicate whether your child has ever been diagnosed with or suspected of having any of the following genetic conditions:

|                              | Never Diagnosed          | Suspected Of Having      | Diagnosed                | Unsure                   |
|------------------------------|--------------------------|--------------------------|--------------------------|--------------------------|
| J27. Tuberos sclerosis (TS)  | <input type="checkbox"/> | <input type="checkbox"/> | <input type="checkbox"/> | <input type="checkbox"/> |
| J28. Down syndrome           | <input type="checkbox"/> | <input type="checkbox"/> | <input type="checkbox"/> | <input type="checkbox"/> |
| J29. Rett syndrome           | <input type="checkbox"/> | <input type="checkbox"/> | <input type="checkbox"/> | <input type="checkbox"/> |
| J30. Fragile X               | <input type="checkbox"/> | <input type="checkbox"/> | <input type="checkbox"/> | <input type="checkbox"/> |
| J31. Neurofibromatosis       | <input type="checkbox"/> | <input type="checkbox"/> | <input type="checkbox"/> | <input type="checkbox"/> |
| J32. Other Genetic Condition | <input type="checkbox"/> | <input type="checkbox"/> | <input type="checkbox"/> | <input type="checkbox"/> |

If "Other", specify: \_\_\_\_\_

Please indicate whether your child has ever been diagnosed with or suspected of having any of the following psychiatric disorders:

|                                                      | Never Diagnosed          | Suspected Of Having      | Diagnosed                | Unsure                   |
|------------------------------------------------------|--------------------------|--------------------------|--------------------------|--------------------------|
| J33. Depression                                      | <input type="checkbox"/> | <input type="checkbox"/> | <input type="checkbox"/> | <input type="checkbox"/> |
| J34. Bipolar Mood Disorder                           | <input type="checkbox"/> | <input type="checkbox"/> | <input type="checkbox"/> | <input type="checkbox"/> |
| J35. Anxiety Disorder                                | <input type="checkbox"/> | <input type="checkbox"/> | <input type="checkbox"/> | <input type="checkbox"/> |
| J36. Obsessive Compulsive Disorder (OCD)             | <input type="checkbox"/> | <input type="checkbox"/> | <input type="checkbox"/> | <input type="checkbox"/> |
| J37. Attention Deficit Hyperactivity Disorder (ADHD) | <input type="checkbox"/> | <input type="checkbox"/> | <input type="checkbox"/> | <input type="checkbox"/> |
| J38. Other Psychiatric Disorder:                     | <input type="checkbox"/> | <input type="checkbox"/> | <input type="checkbox"/> | <input type="checkbox"/> |

If other psychiatric disorder, specify: \_\_\_\_\_

J39. Has your child ever been hospitalized? No Yes Unsure

J39a. Record from most recent hospitalization backwards. If your child has been hospitalized more than 3 times, please only include the 3 most recent incidents.

Hospitalization 1:

- a. Date of Hospitalization: \_\_\_/\_\_\_/\_\_\_
- b. Reason: \_\_\_\_\_
- c. # of days hospitalized: \_\_\_\_\_

Hospitalization 2:

- a. Date of Hospitalization: \_\_\_/\_\_\_/\_\_\_
- b. Reason: \_\_\_\_\_
- c. # of days hospitalized: \_\_\_\_\_

Hospitalization 3:

- a. Date of Hospitalization: \_\_\_/\_\_\_/\_\_\_
- b. Reason: \_\_\_\_\_
- c. # of days hospitalized: \_\_\_\_\_

*For Office Use Only*

ATN ID: \_\_\_\_\_

**Section K: IMMUNIZATION RECORD**

**REMINDER:** Please bring a copy of your child's immunization record to the appointment to review this information with a staff member.

K1. Is the child up to date on immunizations?       No    Yes    Unsure

**Section L: FAMILY HISTORY**

*Instructions: The questions below ask about the family history of the child.*

*Please indicate if there is a family history of the disorder. If "Yes", indicate which family member(s). Include only biological (blood) relatives.*

|     | <b>Disorder</b>                                                                                                     | <b>No</b>                | <b>Yes</b>               | <b>Unsure</b>            | <b>If "Yes", specify all as related to <u>the child</u></b> |                                      |
|-----|---------------------------------------------------------------------------------------------------------------------|--------------------------|--------------------------|--------------------------|-------------------------------------------------------------|--------------------------------------|
| L1. | Autistic Disorder (not including Asperger's disorder or Pervasive Developmental Disorder, not otherwise specified): | <input type="checkbox"/> | <input type="checkbox"/> | <input type="checkbox"/> | <input type="checkbox"/> Grandmother                        | <input type="checkbox"/> Grandfather |
|     |                                                                                                                     |                          |                          |                          | <input type="checkbox"/> Mother                             | <input type="checkbox"/> Father      |
|     |                                                                                                                     |                          |                          |                          | <input type="checkbox"/> Aunt                               | <input type="checkbox"/> Uncle       |
|     |                                                                                                                     |                          |                          |                          | <input type="checkbox"/> Sister                             | <input type="checkbox"/> Brother     |
|     |                                                                                                                     |                          |                          |                          | <input type="checkbox"/> Cousin                             | <input type="checkbox"/> Other       |
| L2. | Asperger's Disorder:                                                                                                | <input type="checkbox"/> | <input type="checkbox"/> | <input type="checkbox"/> | <input type="checkbox"/> Grandmother                        | <input type="checkbox"/> Grandfather |
|     |                                                                                                                     |                          |                          |                          | <input type="checkbox"/> Mother                             | <input type="checkbox"/> Father      |
|     |                                                                                                                     |                          |                          |                          | <input type="checkbox"/> Aunt                               | <input type="checkbox"/> Uncle       |
|     |                                                                                                                     |                          |                          |                          | <input type="checkbox"/> Sister                             | <input type="checkbox"/> Brother     |
|     |                                                                                                                     |                          |                          |                          | <input type="checkbox"/> Cousin                             | <input type="checkbox"/> Other       |
| L3. | Pervasive Developmental Disorder, not otherwise specified (PDD-NOS):                                                | <input type="checkbox"/> | <input type="checkbox"/> | <input type="checkbox"/> | <input type="checkbox"/> Grandmother                        | <input type="checkbox"/> Grandfather |
|     |                                                                                                                     |                          |                          |                          | <input type="checkbox"/> Mother                             | <input type="checkbox"/> Father      |
|     |                                                                                                                     |                          |                          |                          | <input type="checkbox"/> Aunt                               | <input type="checkbox"/> Uncle       |
|     |                                                                                                                     |                          |                          |                          | <input type="checkbox"/> Sister                             | <input type="checkbox"/> Brother     |
|     |                                                                                                                     |                          |                          |                          | <input type="checkbox"/> Cousin                             | <input type="checkbox"/> Other       |
| L4. | Rett Syndrome:                                                                                                      | <input type="checkbox"/> | <input type="checkbox"/> | <input type="checkbox"/> | <input type="checkbox"/> Grandmother                        | <input type="checkbox"/> Grandfather |
|     |                                                                                                                     |                          |                          |                          | <input type="checkbox"/> Mother                             | <input type="checkbox"/> Father      |
|     |                                                                                                                     |                          |                          |                          | <input type="checkbox"/> Aunt                               | <input type="checkbox"/> Uncle       |
|     |                                                                                                                     |                          |                          |                          | <input type="checkbox"/> Sister                             | <input type="checkbox"/> Brother     |
|     |                                                                                                                     |                          |                          |                          | <input type="checkbox"/> Cousin                             | <input type="checkbox"/> Other       |
| L5. | Mental Retardation:                                                                                                 | <input type="checkbox"/> | <input type="checkbox"/> | <input type="checkbox"/> | <input type="checkbox"/> Grandmother                        | <input type="checkbox"/> Grandfather |
|     |                                                                                                                     |                          |                          |                          | <input type="checkbox"/> Mother                             | <input type="checkbox"/> Father      |
|     |                                                                                                                     |                          |                          |                          | <input type="checkbox"/> Aunt                               | <input type="checkbox"/> Uncle       |
|     |                                                                                                                     |                          |                          |                          | <input type="checkbox"/> Sister                             | <input type="checkbox"/> Brother     |
|     |                                                                                                                     |                          |                          |                          | <input type="checkbox"/> Cousin                             | <input type="checkbox"/> Other       |

*For Office Use Only*

ATN ID: \_\_\_\_\_

|      | <b>Disorder</b>                                    | <b>No</b>                | <b>Yes</b>               | <b>Unsure</b>            | <b>If "Yes", specify all as related to <u>the child</u></b>                                                                                                                    |                                                                                                                                                                                 |
|------|----------------------------------------------------|--------------------------|--------------------------|--------------------------|--------------------------------------------------------------------------------------------------------------------------------------------------------------------------------|---------------------------------------------------------------------------------------------------------------------------------------------------------------------------------|
| L6.  | Speech language disorder, received speech therapy: | <input type="checkbox"/> | <input type="checkbox"/> | <input type="checkbox"/> | <input type="checkbox"/> Grandmother<br><input type="checkbox"/> Mother<br><input type="checkbox"/> Aunt<br><input type="checkbox"/> Sister<br><input type="checkbox"/> Cousin | <input type="checkbox"/> Grandfather<br><input type="checkbox"/> Father<br><input type="checkbox"/> Uncle<br><input type="checkbox"/> Brother<br><input type="checkbox"/> Other |
| L7.  | ADHD:                                              | <input type="checkbox"/> | <input type="checkbox"/> | <input type="checkbox"/> | <input type="checkbox"/> Grandmother<br><input type="checkbox"/> Mother<br><input type="checkbox"/> Aunt<br><input type="checkbox"/> Sister<br><input type="checkbox"/> Cousin | <input type="checkbox"/> Grandfather<br><input type="checkbox"/> Father<br><input type="checkbox"/> Uncle<br><input type="checkbox"/> Brother<br><input type="checkbox"/> Other |
| L8.  | Anxiety Disorder or Obsessive-Compulsive Disorder: | <input type="checkbox"/> | <input type="checkbox"/> | <input type="checkbox"/> | <input type="checkbox"/> Grandmother<br><input type="checkbox"/> Mother<br><input type="checkbox"/> Aunt<br><input type="checkbox"/> Sister<br><input type="checkbox"/> Cousin | <input type="checkbox"/> Grandfather<br><input type="checkbox"/> Father<br><input type="checkbox"/> Uncle<br><input type="checkbox"/> Brother<br><input type="checkbox"/> Other |
| L9.  | Depression:                                        | <input type="checkbox"/> | <input type="checkbox"/> | <input type="checkbox"/> | <input type="checkbox"/> Grandmother<br><input type="checkbox"/> Mother<br><input type="checkbox"/> Aunt<br><input type="checkbox"/> Sister<br><input type="checkbox"/> Cousin | <input type="checkbox"/> Grandfather<br><input type="checkbox"/> Father<br><input type="checkbox"/> Uncle<br><input type="checkbox"/> Brother<br><input type="checkbox"/> Other |
| L10. | Manic depression or bipolar disorder:              | <input type="checkbox"/> | <input type="checkbox"/> | <input type="checkbox"/> | <input type="checkbox"/> Grandmother<br><input type="checkbox"/> Mother<br><input type="checkbox"/> Aunt<br><input type="checkbox"/> Sister<br><input type="checkbox"/> Cousin | <input type="checkbox"/> Grandfather<br><input type="checkbox"/> Father<br><input type="checkbox"/> Uncle<br><input type="checkbox"/> Brother<br><input type="checkbox"/> Other |
| L11. | Schizophrenia:                                     | <input type="checkbox"/> | <input type="checkbox"/> | <input type="checkbox"/> | <input type="checkbox"/> Grandmother<br><input type="checkbox"/> Mother<br><input type="checkbox"/> Aunt<br><input type="checkbox"/> Sister<br><input type="checkbox"/> Cousin | <input type="checkbox"/> Grandfather<br><input type="checkbox"/> Father<br><input type="checkbox"/> Uncle<br><input type="checkbox"/> Brother<br><input type="checkbox"/> Other |
| L12. | Seizures:                                          | <input type="checkbox"/> | <input type="checkbox"/> | <input type="checkbox"/> | <input type="checkbox"/> Grandmother<br><input type="checkbox"/> Mother<br><input type="checkbox"/> Aunt<br><input type="checkbox"/> Sister<br><input type="checkbox"/> Cousin | <input type="checkbox"/> Grandfather<br><input type="checkbox"/> Father<br><input type="checkbox"/> Uncle<br><input type="checkbox"/> Brother<br><input type="checkbox"/> Other |
| L13. | Neurofibromatosis:                                 | <input type="checkbox"/> | <input type="checkbox"/> | <input type="checkbox"/> | <input type="checkbox"/> Grandmother<br><input type="checkbox"/> Mother<br><input type="checkbox"/> Aunt<br><input type="checkbox"/> Sister<br><input type="checkbox"/> Cousin | <input type="checkbox"/> Grandfather<br><input type="checkbox"/> Father<br><input type="checkbox"/> Uncle<br><input type="checkbox"/> Brother<br><input type="checkbox"/> Other |

*For Office Use Only*

ATN ID: \_\_\_\_\_

|      | <b>Disorder</b>                                                                      | <b>No</b>                | <b>Yes</b>               | <b>Unsure</b>            | <b>If "Yes", specify all as related to <u>the child</u></b> |                                      |
|------|--------------------------------------------------------------------------------------|--------------------------|--------------------------|--------------------------|-------------------------------------------------------------|--------------------------------------|
| L14. | Fragile X:                                                                           | <input type="checkbox"/> | <input type="checkbox"/> | <input type="checkbox"/> | <input type="checkbox"/> Grandmother                        | <input type="checkbox"/> Grandfather |
|      |                                                                                      |                          |                          |                          | <input type="checkbox"/> Mother                             | <input type="checkbox"/> Father      |
|      |                                                                                      |                          |                          |                          | <input type="checkbox"/> Aunt                               | <input type="checkbox"/> Uncle       |
|      |                                                                                      |                          |                          |                          | <input type="checkbox"/> Sister                             | <input type="checkbox"/> Brother     |
|      |                                                                                      |                          |                          |                          | <input type="checkbox"/> Cousin                             | <input type="checkbox"/> Other       |
| L15. | Tuberous Sclerosis:                                                                  | <input type="checkbox"/> | <input type="checkbox"/> | <input type="checkbox"/> | <input type="checkbox"/> Grandmother                        | <input type="checkbox"/> Grandfather |
|      |                                                                                      |                          |                          |                          | <input type="checkbox"/> Mother                             | <input type="checkbox"/> Father      |
|      |                                                                                      |                          |                          |                          | <input type="checkbox"/> Aunt                               | <input type="checkbox"/> Uncle       |
|      |                                                                                      |                          |                          |                          | <input type="checkbox"/> Sister                             | <input type="checkbox"/> Brother     |
|      |                                                                                      |                          |                          |                          | <input type="checkbox"/> Cousin                             | <input type="checkbox"/> Other       |
| L16. | Auto-immune disorders<br>(e.g., Lupus, Rheumatoid<br>Arthritis, Multiple Sclerosis): | <input type="checkbox"/> | <input type="checkbox"/> | <input type="checkbox"/> | <input type="checkbox"/> Grandmother                        | <input type="checkbox"/> Grandfather |
|      |                                                                                      |                          |                          |                          | <input type="checkbox"/> Mother                             | <input type="checkbox"/> Father      |
|      |                                                                                      |                          |                          |                          | <input type="checkbox"/> Aunt                               | <input type="checkbox"/> Uncle       |
|      |                                                                                      |                          |                          |                          | <input type="checkbox"/> Sister                             | <input type="checkbox"/> Brother     |
|      |                                                                                      |                          |                          |                          | <input type="checkbox"/> Cousin                             | <input type="checkbox"/> Other       |
| L17. | Inflammatory Bowel<br>Disease (Crohn's or<br>Ulcerative Colitis), etc.):             | <input type="checkbox"/> | <input type="checkbox"/> | <input type="checkbox"/> | <input type="checkbox"/> Grandmother                        | <input type="checkbox"/> Grandfather |
|      |                                                                                      |                          |                          |                          | <input type="checkbox"/> Mother                             | <input type="checkbox"/> Father      |
|      |                                                                                      |                          |                          |                          | <input type="checkbox"/> Aunt                               | <input type="checkbox"/> Uncle       |
|      |                                                                                      |                          |                          |                          | <input type="checkbox"/> Sister                             | <input type="checkbox"/> Brother     |
|      |                                                                                      |                          |                          |                          | <input type="checkbox"/> Cousin                             | <input type="checkbox"/> Other       |
| L18. | Other condition that is in 2<br>or more generations:                                 | <input type="checkbox"/> | <input type="checkbox"/> | <input type="checkbox"/> | <input type="checkbox"/> Grandmother                        | <input type="checkbox"/> Grandfather |
|      |                                                                                      |                          |                          |                          | <input type="checkbox"/> Mother                             | <input type="checkbox"/> Father      |
|      |                                                                                      |                          |                          |                          | <input type="checkbox"/> Aunt                               | <input type="checkbox"/> Uncle       |
|      |                                                                                      |                          |                          |                          | <input type="checkbox"/> Sister                             | <input type="checkbox"/> Brother     |
|      |                                                                                      |                          |                          |                          | <input type="checkbox"/> Cousin                             | <input type="checkbox"/> Other       |

If "Yes", specify condition: \_\_\_\_\_

*For Office Use Only*

ATN ID: \_\_\_\_\_

**Section M: LABS, IMAGING, EEG**

Please indicate whether your child has ever had any of the following procedures:

- |                                       |                             |                              |                                 |
|---------------------------------------|-----------------------------|------------------------------|---------------------------------|
| M1. Karyotype                         | <input type="checkbox"/> No | <input type="checkbox"/> Yes | <input type="checkbox"/> Unsure |
| M2. Fragile X DNA                     | <input type="checkbox"/> No | <input type="checkbox"/> Yes | <input type="checkbox"/> Unsure |
| M3. CGH Microarray                    | <input type="checkbox"/> No | <input type="checkbox"/> Yes | <input type="checkbox"/> Unsure |
| M4. Testing for Rett Syndrome (MECP2) | <input type="checkbox"/> No | <input type="checkbox"/> Yes | <input type="checkbox"/> Unsure |
| M5. Plasma Amino Acids                | <input type="checkbox"/> No | <input type="checkbox"/> Yes | <input type="checkbox"/> Unsure |
| M6. Urine for Organic Acids           | <input type="checkbox"/> No | <input type="checkbox"/> Yes | <input type="checkbox"/> Unsure |
| M7. Uric Acid                         | <input type="checkbox"/> No | <input type="checkbox"/> Yes | <input type="checkbox"/> Unsure |
| M8. MRI of the brain                  | <input type="checkbox"/> No | <input type="checkbox"/> Yes | <input type="checkbox"/> Unsure |
| M9. EEG                               | <input type="checkbox"/> No | <input type="checkbox"/> Yes | <input type="checkbox"/> Unsure |
| M10. Sleep Study                      | <input type="checkbox"/> No | <input type="checkbox"/> Yes | <input type="checkbox"/> Unsure |
| M11. Lead screening                   | <input type="checkbox"/> No | <input type="checkbox"/> Yes | <input type="checkbox"/> Unsure |

Examiner Initials: \_\_\_\_\_

**Thank you for completing this questionnaire. (END OF FORM)**

*For Office Use Only*

ATN ID: \_\_\_\_\_

Staff Reviewer: \_\_\_\_\_

Date of Review: \_\_\_\_ / \_\_\_\_ / \_\_\_\_
