# Supplementary material
Source: PubMed Central journal article supplement (PMC4024363)
Supplement: NIHMS571968-supplement-Supplement_3.pdf [file NIHMS571968-supplement-Supplement_3.pdf]

**Parent/Guardian Instructions:**

*This questionnaire may take up to 30 minutes to complete and asks questions regarding gastrointestinal (GI) symptoms your child may have experienced. The questionnaire should only be completed by the child's primary caretaker (that is, the person who is responsible for taking care of the child most of the time). If you are not a primary caretaker, please let the staff member know who is so that we may contact that person.*

*This questionnaire is designed so you can fill it in yourself. There are no right or wrong answers, but please answer each question to the best of your ability. You may choose not to answer questions that make you uncomfortable.*

*While completing this survey it is okay to leave information blank or make additional notes regarding questions or comments you have. Once you have completed this form it will be reviewed with you by a staff member; at that time please ask any questions you had while trying to complete this form.*

*Please note that all information is kept strictly confidential.*

For Office Use Only

ATN ID: \_\_\_\_\_

Baseline Visit Only



**INSTRUCTIONS:** If you answered "Yes" to your child experiencing any of the symptoms listed above, go to question B2, otherwise, skip to question B6.

- |                                                                                | NO                       | YES                      | UNSURE                   |
|--------------------------------------------------------------------------------|--------------------------|--------------------------|--------------------------|
| B2. In the <u>last 3 months</u> ...                                            |                          |                          |                          |
| B2a. Did the symptom(s) get better after having a bowel movement?              | <input type="checkbox"/> | <input type="checkbox"/> | <input type="checkbox"/> |
| B2b. Were your child's bowel movements (BMs) softer or more watery than usual? | <input type="checkbox"/> | <input type="checkbox"/> | <input type="checkbox"/> |
| B2c. Were your child's BMs harder or lumpier than usual?                       | <input type="checkbox"/> | <input type="checkbox"/> | <input type="checkbox"/> |
| B2d. Did your child have more BMs than usual?                                  | <input type="checkbox"/> | <input type="checkbox"/> | <input type="checkbox"/> |
| B2e. Did your child have fewer BMs than usual?                                 | <input type="checkbox"/> | <input type="checkbox"/> | <input type="checkbox"/> |
| B2f. Did your child's symptom(s) occur before eating or when hungry?           | <input type="checkbox"/> | <input type="checkbox"/> | <input type="checkbox"/> |
| B2g. Did the symptom(s) <u>change</u> after your child ate?                    | <input type="checkbox"/> | <input type="checkbox"/> | <input type="checkbox"/> |
| B2h. Did the symptom(s) wake your child from sleep?                            | <input type="checkbox"/> | <input type="checkbox"/> | <input type="checkbox"/> |

**INSTRUCTIONS:** If your child enrolled in the ATN is a girl, answer the next question, otherwise skip to question B4.

- B3. In the last 3 months, did your daughter's symptom(s) occur just before or during menstrual periods?  
NO      YES      NO MENSTRUAL CYCLES      UNSURE
- B4. In the last 3 months, did antacids relieve your child's symptom(s)?  
NO      YES      NEVER USED ANTACIDS      UNSURE
- B5. At what time of day did your child's symptom(s) usually begin?  
DURING THE DAY, WHILE HE/SHE WAS AWAKE  
AT NIGHT WHILE HE/SHE WAS ASLEEP  
AT ANY TIME OF DAY OR NIGHT  
UNSURE
- B6. In the last year, did your child have severe gastrointestinal (tummy) pain that lasted 2 hours (or longer) and caused your child to stop all activities?  
NO      YES      UNSURE

*For Office Use Only*

ATN ID: \_\_\_\_\_

B7. In the last 3 months, how often did your child usually have BMs?

- LESS THAN ONCE A WEEK
- 1-2 TIMES A WEEK
- 3-6 TIMES A WEEK
- ONCE A DAY
- 2-3 TIMES A DAY
- MORE THAN 3 TIMES A DAY
- UNSURE

B8. In the last 3 months, what were your child's BMs usually like?

- VERY HARD
- HARD
- NOT TOO HARD AND NOT TOO SOFT
- VERY SOFT OR MUSHY
- WATERY
- UNSURE

B9. In the last 3 months, did your child appear to feel pain when having a BM?

- NO
- YES
- UNSURE

B10. In the last 3 months, did your child have to rush to the bathroom for a BM?

- NO
- YES
- UNSURE

|                                                                                                                                                                                             | NO                       | YES                      | UNSURE                   |
|---------------------------------------------------------------------------------------------------------------------------------------------------------------------------------------------|--------------------------|--------------------------|--------------------------|
| B11. In the <u>last 3 months</u> , did your child pass <u>mucus or phlegm</u> during a BM?<br><i>(Mucus or phlegm: white/yellowish, stringy or slimy material)</i>                          | <input type="checkbox"/> | <input type="checkbox"/> | <input type="checkbox"/> |
| B12. In the <u>last 3 months</u> , did you see your child <u>stiffen</u> his/her legs or <u>squeeze</u> his/her buttocks (bottom) and legs together when he/she felt the need to have a BM? | <input type="checkbox"/> | <input type="checkbox"/> | <input type="checkbox"/> |
| B13. After passing a stool, was your child...                                                                                                                                               |                          |                          |                          |
| B13a. More active?                                                                                                                                                                          | <input type="checkbox"/> | <input type="checkbox"/> | <input type="checkbox"/> |
| B13b. Less irritable?                                                                                                                                                                       | <input type="checkbox"/> | <input type="checkbox"/> | <input type="checkbox"/> |
| B14. In the <u>last 3 months</u> , did your child <u>stain or soil</u> underwear?                                                                                                           | <input type="checkbox"/> | <input type="checkbox"/> | <input type="checkbox"/> |
| B15. Has your child <u>ever</u> had a black, tarry BM?                                                                                                                                      | <input type="checkbox"/> | <input type="checkbox"/> | <input type="checkbox"/> |
| B16. Has your child <u>ever</u> had red blood in or after a BM?                                                                                                                             | <input type="checkbox"/> | <input type="checkbox"/> | <input type="checkbox"/> |
| B17. In the <u>last 3 months</u> , has your child...                                                                                                                                        |                          |                          |                          |
| B17a. Spit up 2 or more times a day?                                                                                                                                                        | <input type="checkbox"/> | <input type="checkbox"/> | <input type="checkbox"/> |
| B17b. Experienced <u>retching</u> ?<br><i>(Retching- dry heaves, try to vomit but nothing comes up)</i>                                                                                     | <input type="checkbox"/> | <input type="checkbox"/> | <input type="checkbox"/> |
| B17c. Tilted head to the side and arched back?                                                                                                                                              | <input type="checkbox"/> | <input type="checkbox"/> | <input type="checkbox"/> |
| B17d. <u>Regurgitated</u> food and chewed it again? <i>(Regurgitation- food comes back up but there is no nausea or attempt to vomit.)</i>                                                  | <input type="checkbox"/> | <input type="checkbox"/> | <input type="checkbox"/> |

For Office Use Only

ATN ID: \_\_\_\_\_

- |                                                                                                                                                                                            | NO                       | YES                      | UNSURE                   |                          |                          |
|--------------------------------------------------------------------------------------------------------------------------------------------------------------------------------------------|--------------------------|--------------------------|--------------------------|--------------------------|--------------------------|
| B18. In the <u>last 3 months</u> , has your child had <u>trouble gaining weight</u> ?                                                                                                      | <input type="checkbox"/> | <input type="checkbox"/> | <input type="checkbox"/> |                          |                          |
| B19. In the <u>last 3 months</u> , did your child <u>miss activities</u> because of...                                                                                                     |                          |                          |                          |                          |                          |
| B19a. Pain and/or discomfort?                                                                                                                                                              | <input type="checkbox"/> | <input type="checkbox"/> | <input type="checkbox"/> |                          |                          |
| B19b. Vomiting?                                                                                                                                                                            | <input type="checkbox"/> | <input type="checkbox"/> | <input type="checkbox"/> |                          |                          |
| B19c. Problems with BMs?                                                                                                                                                                   | <input type="checkbox"/> | <input type="checkbox"/> | <input type="checkbox"/> |                          |                          |
| B19d. Excessive gas?                                                                                                                                                                       | <input type="checkbox"/> | <input type="checkbox"/> | <input type="checkbox"/> |                          |                          |
| B20. Some parents may have difficulty describing/assessing their child's pain. Do you feel confident that you can accurately assess your child's pain?                                     |                          |                          |                          |                          |                          |
|                                                                                                                                                                                            | EXTREMELY UNSURE         | VERY UNSURE              | SOMEWHAT SURE            | VERY SURE                | EXTREMELY SURE           |
|                                                                                                                                                                                            | <input type="checkbox"/> |
|                                                                                                                                                                                            |                          |                          |                          |                          |                          |
|                                                                                                                                                                                            |                          |                          |                          |                          |                          |
| B21. In the <u>last 3 months</u> did your child push his abdomen with his/her hands or your hands, push his/her abdomen against or lean forward over furniture?                            | <input type="checkbox"/> | <input type="checkbox"/> | <input type="checkbox"/> |                          |                          |
| B22. In the <u>last 3 months</u> , did your child do things like punching her/his chest or neck, putting her/his fist into their mouth, or biting her/his hands or wrist without a reason? | <input type="checkbox"/> | <input type="checkbox"/> | <input type="checkbox"/> |                          |                          |
| B23. In the <u>last 3 months</u> , did your child choke, gag, cough, or sound wet during or after swallowing or with meals?                                                                | <input type="checkbox"/> | <input type="checkbox"/> | <input type="checkbox"/> |                          |                          |
| B24. In the <u>last 3 months</u> , has your child started to refuse many foods that he or she would eat in the past?                                                                       | <input type="checkbox"/> | <input type="checkbox"/> | <input type="checkbox"/> |                          |                          |

**Thank you for taking the time to complete this survey! (END OF FORM)**

ATN ID: \_\_\_\_\_  
 Staff Reviewer: \_\_\_\_\_

*For Office Use Only*

Date of Review: \_\_\_\_ / \_\_\_\_ / \_\_\_\_
